# Supplementary material
Source: HighWire-hosted journal article supplement (https://bmjopenquality.bmj.com/highwire/filestream/145561/field_highwire_adjunct_files/0/bmjoq-2022-002119supp001_data_supplement.pdf)

## APPENDIX 1. YEARS algorithm

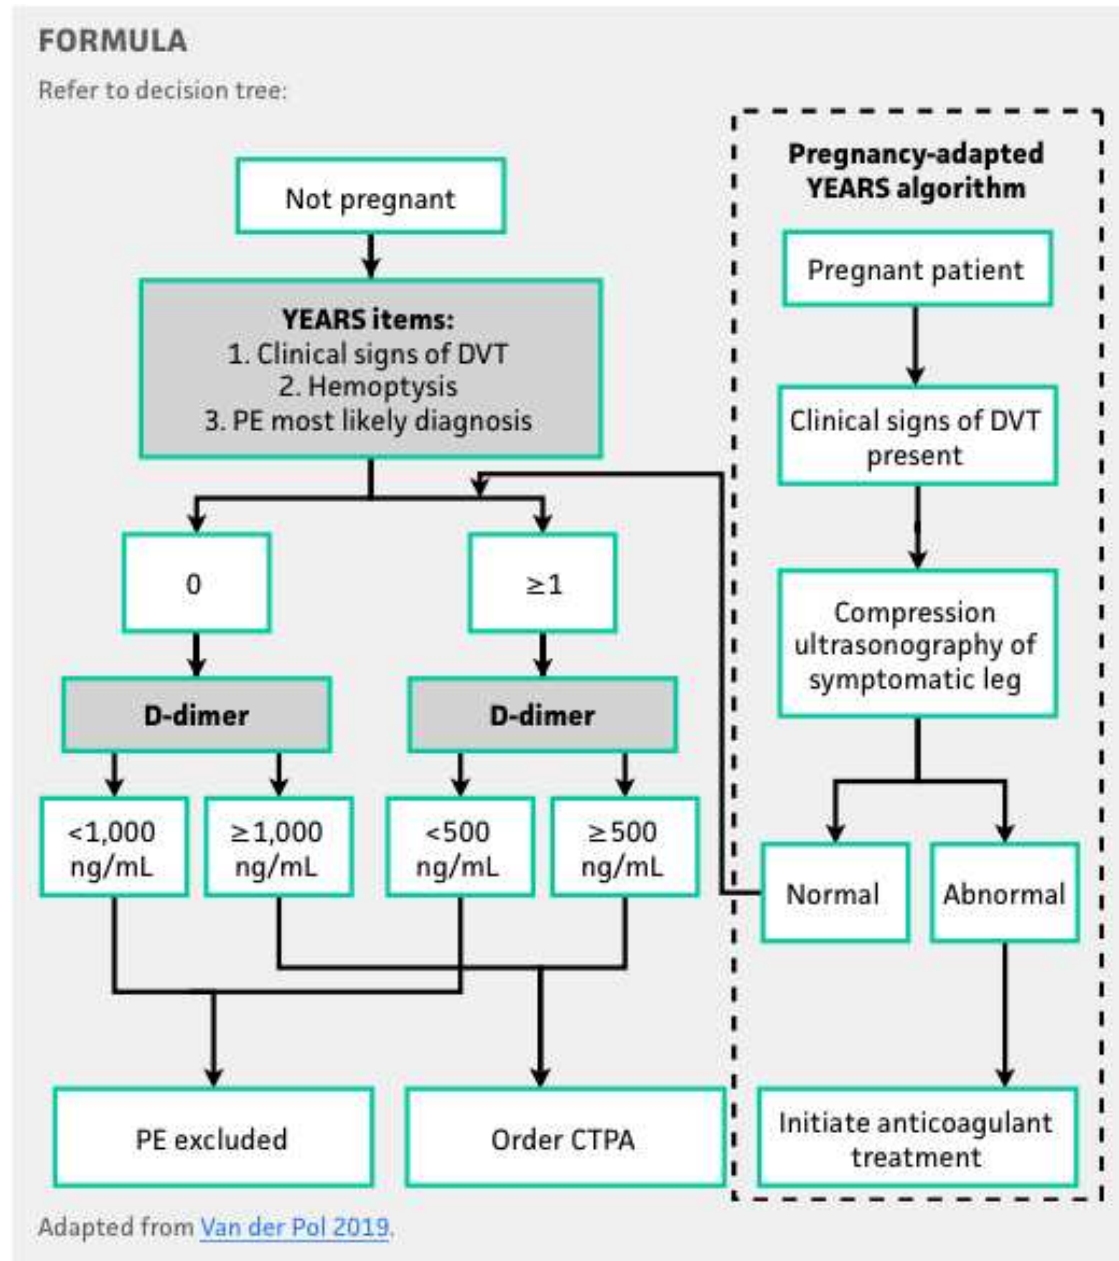

Supplement: bmjoq-2022-002119supp001_data_supplement.pdf [file bmjoq-2022-002119supp001_data_supplement.pdf]
